# Supplementary material
Source: PubMed Central journal article supplement (PMC2494917)
Supplement: M802330200_1.pdf [file M802330200_1.pdf]

Tubulin: a molecular target of ITCs for inducing cell growth arrest and apoptosis

## Supplemental Materials

### Supplemental Figures

Covalent binding of ITCs to cysteine residues in tubulin is indicated by nanoRPLC-MS/MS. A cysteine-containing peptide in  $\beta$ -tubulin,  $^{298}\text{NMMAACDPR}^{306}$  ( $[\text{M} + \text{H}]^+$  of  $m/z$  1008.4), was further analyzed by tandem mass spectrometry. The spectra indicate that the mass additions were exclusively on the cysteine residue, as indicated by increases in  $m/z$  of the related b- and y-type fragment ions, following modification by BITC (**A**), PEITC (**B**), and SFN (**C**).

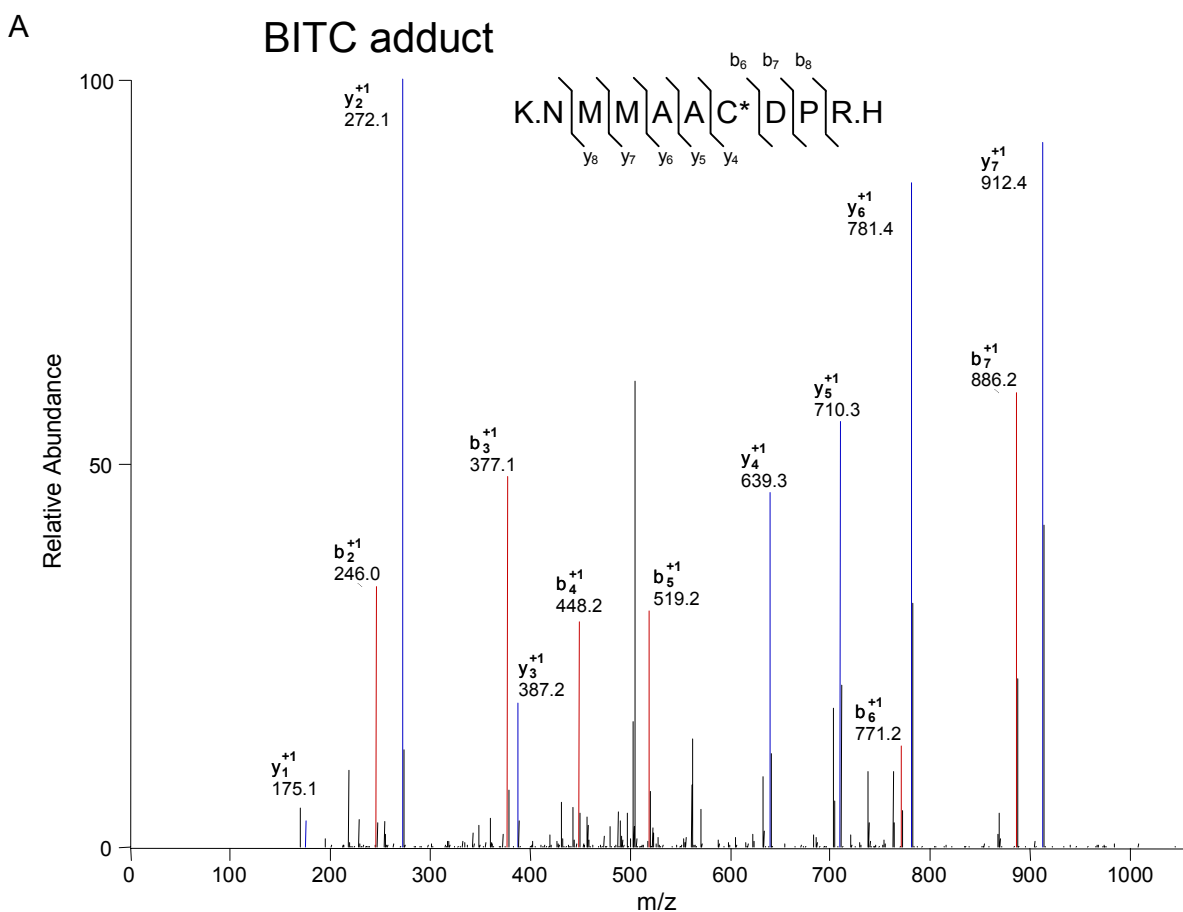

Supplemental Figure A

Tubulin: a molecular target of ITCs for inducing cell growth arrest and apoptosis

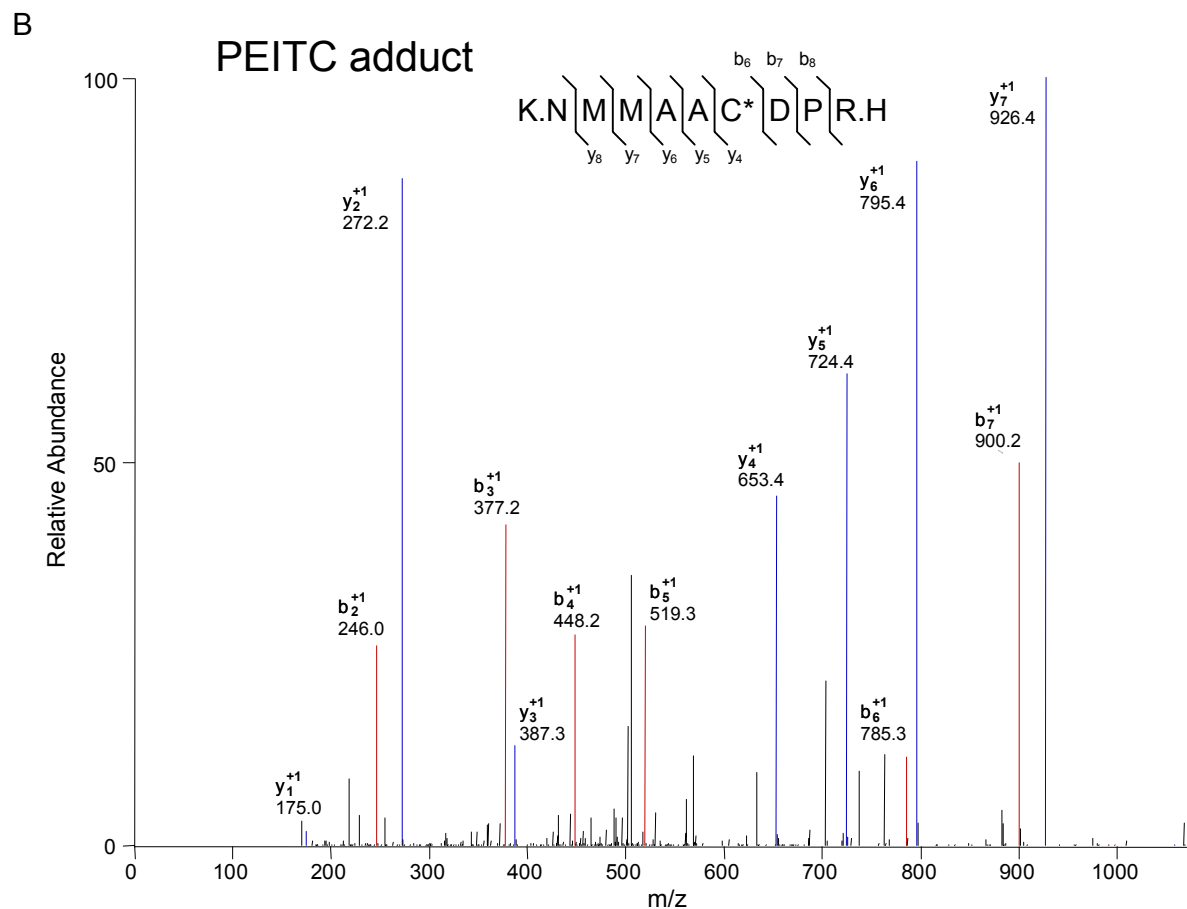

Supplemental Figure B

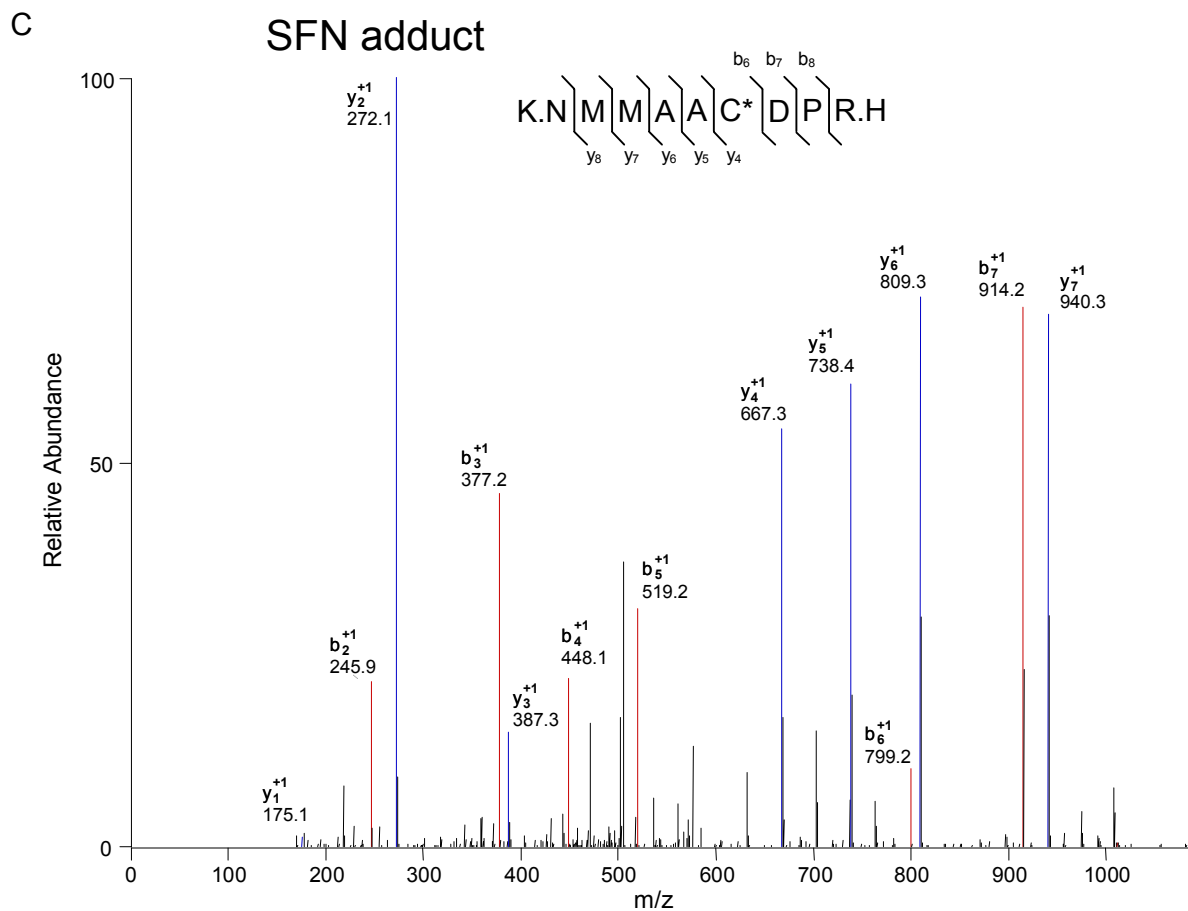

Supplemental Figure C
